# Supplementary material for: A Calix[8]arene-Based Catalyst for Suzuki–Miyaura Couplings with Reduced Pd_Leaching
Source: MDPI journal article supplement (doi:10.3390/catal12101098), 2022-09-22

# A Calix[8]arene-Based Catalyst for Suzuki–Miyaura Couplings with Reduced Pd\_Leaching

Erika Adhel, Axel Labattut, Timothée Naret, Diana Dragoe and Vincent Huc \*

## Supplementary Materials

### General:

All the solvents were purchased from TCI and Aldrich as anhydrous, and used as received. Compound **5** was purchased from NOVECAL (Orsay, France: <https://www.novecal.com/>, accessed on 22 July 2022). Compound **6** was purchased from CHEMIELIVA (JiangBei, Chongqing, China) and used as received.

**Figure S1.** Synthetic scheme of compound 8.

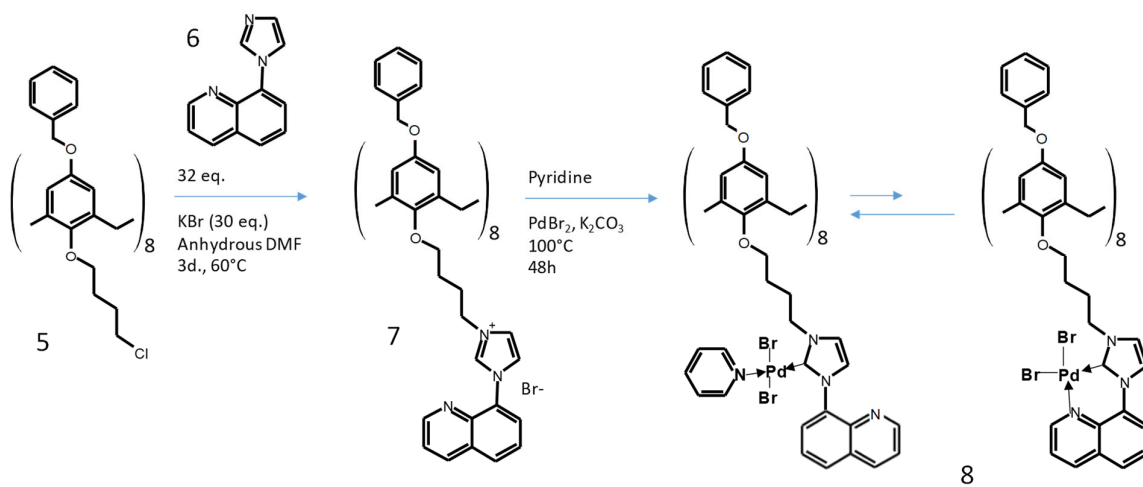

A) imidazolium salt 7

**Figure S2.**  $^1\text{H}$  NMR spectrum of compound 7

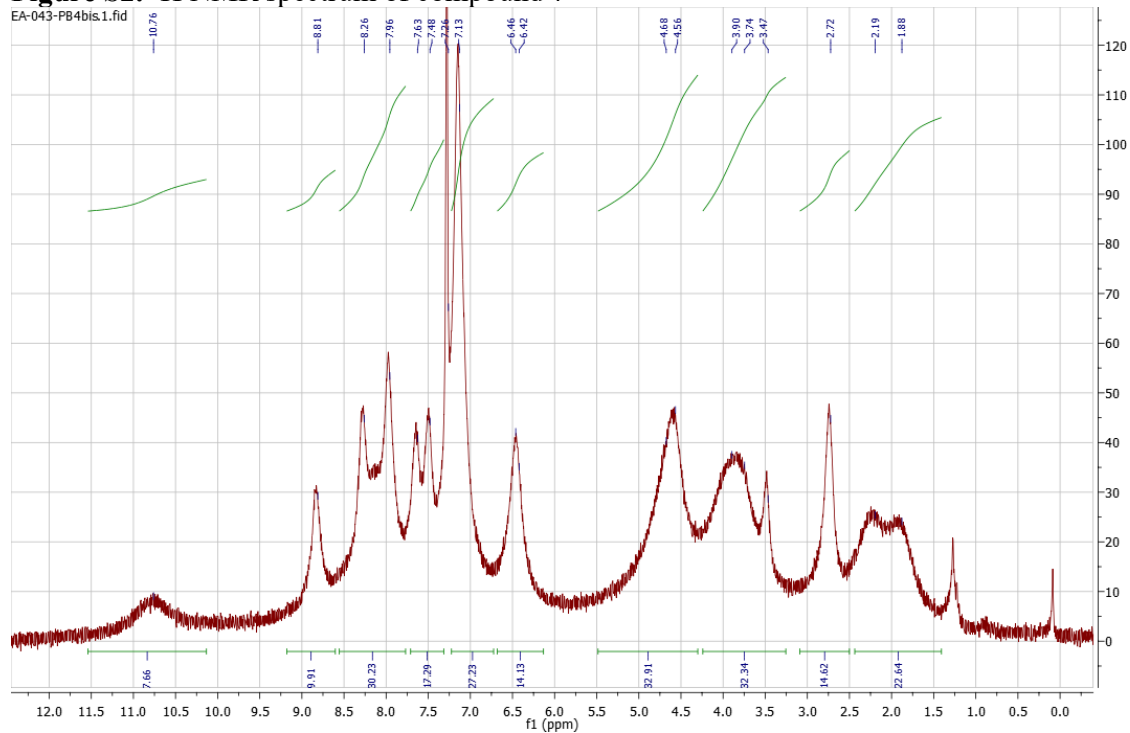

**Figure S3.**  $^{13}\text{C}$  NMR spectrum of compound 7

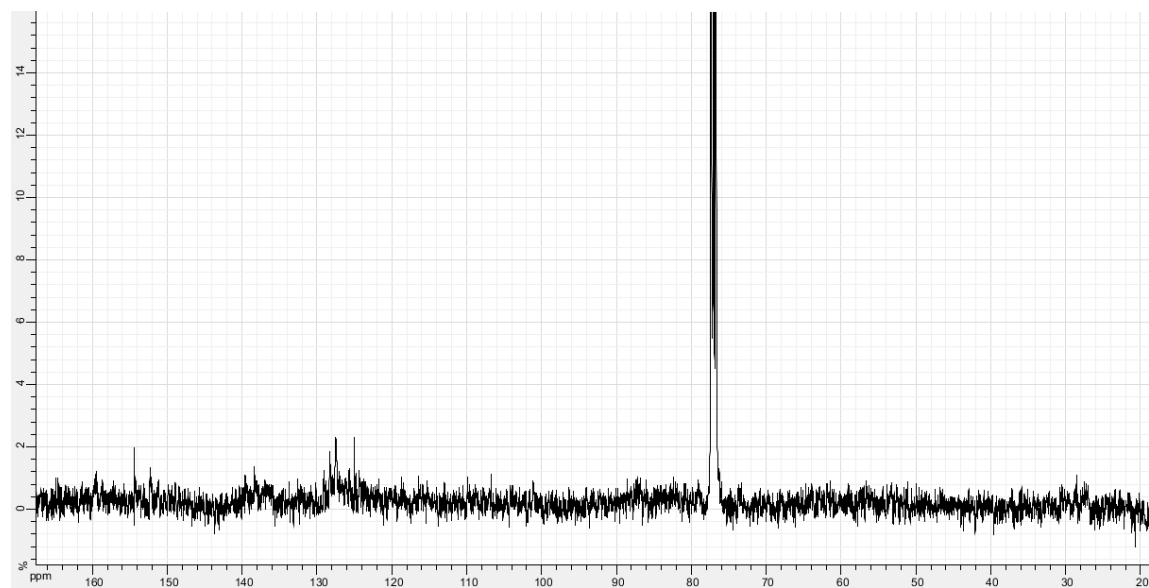

**Figure S4.** XPS spectrum of compound **7**

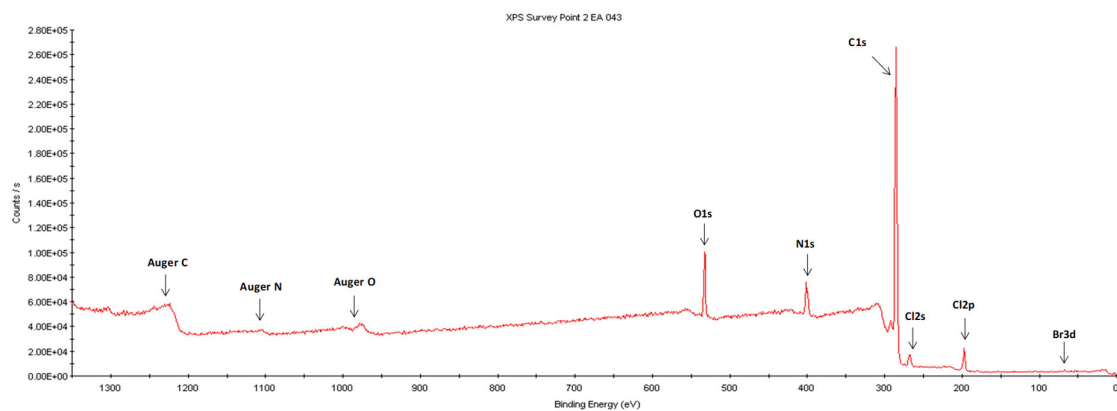

|                   |        |      |           |         |             |
|-------------------|--------|------|-----------|---------|-------------|
| Cl <sub>2</sub> p | 196,46 | 1,45 | 8739,12   | 52,02   | <b>2,8</b>  |
| C <sub>1</sub> s  | 284,67 | 2,26 | 110116,29 | 1562,81 | <b>83,2</b> |
| N <sub>1</sub> s  | 401,39 | 1,4  | 16044,5   | 134,5   | <b>7,2</b>  |
| O <sub>1</sub> s  | 532,48 | 1,54 | 22796,95  | 126,83  | <b>6,8</b>  |
| Br <sub>3</sub> d | 67,19  | 1,91 | 463,74    | 2,1     | <b>0,1</b>  |

**B) compound 8.**

**Figure S5.**  $^1\text{H}$  NMR spectrum of compound **8** ( $\text{DMSO}-d_6$ )

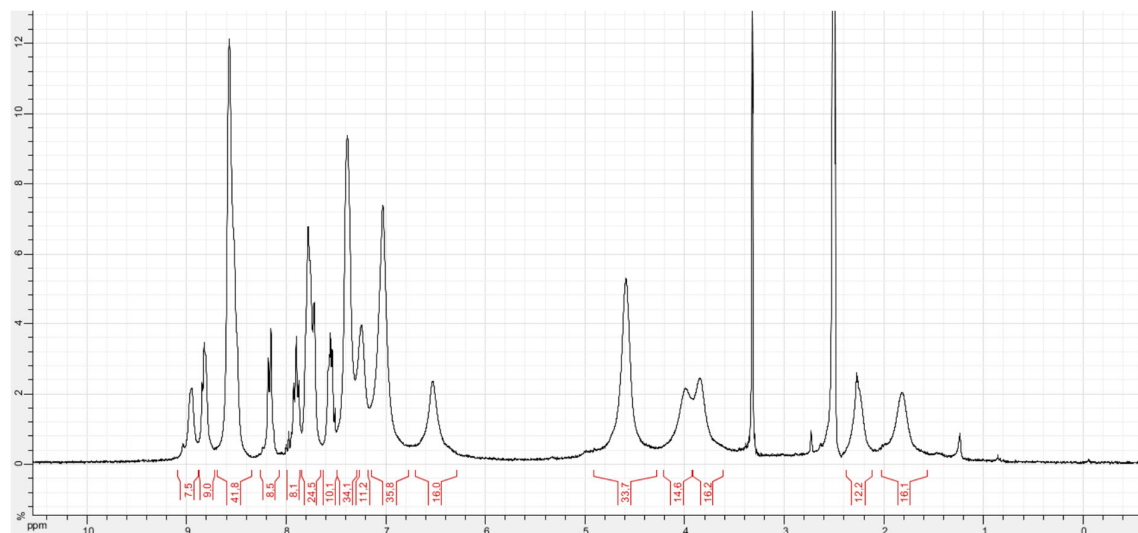

**Figure S6.**  $^1\text{H}$  NMR spectrum of compound **8** ( $\text{CDCl}_3$ )

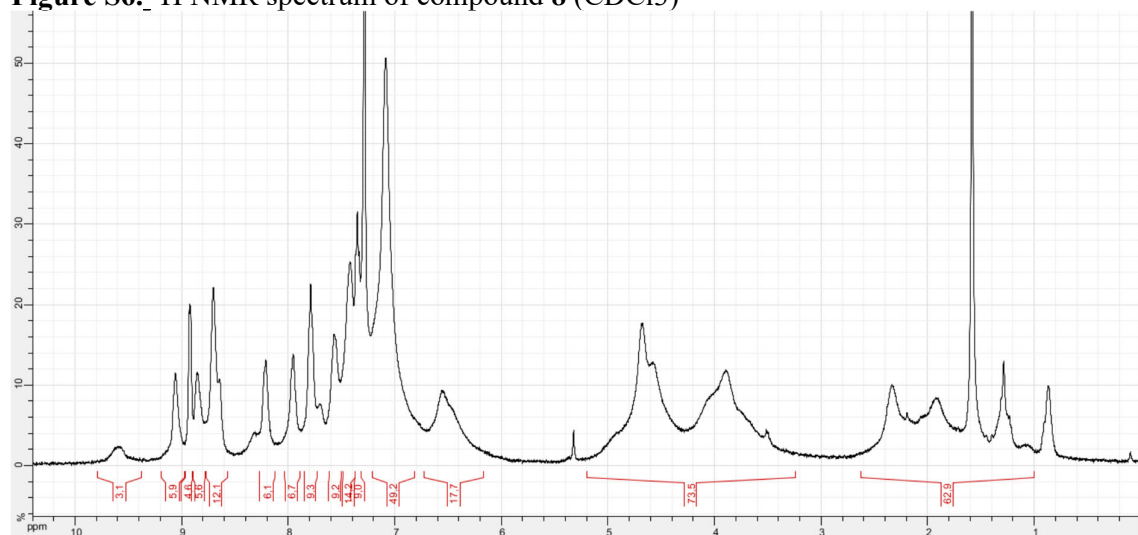

(300 MHz,  $\text{CDCl}_3$ ):  $\delta$  (ppm)= 8.82 (d, *o*-pyridine); 7.69 (t, *p*-pyridine); 7.26 (t, *m*-pyridine) – 8.95 (m, *o*-quinoline), 7.87 (m, *p*-quinoline); 7.70 (m, *m*-quinoline); 8.8-8.6 (Ar quinoline); 7.2-6.80 (Ar benzyl), 6.8-6.2 (Ar-hydroquinone); 5-4.25 (Ar- $\text{CH}_2$ -O-); 4.2-3.2 (Ar- $\text{CH}_2$ -Ar /  $\text{CH}_2$ -O /  $\text{CH}_2$ -N+); 2.6-1.6 ( $-\text{CH}_2-\text{CH}_2-$ )

**Figure S7.**  $^{13}\text{C}$  NMR spectrum of compound **8**

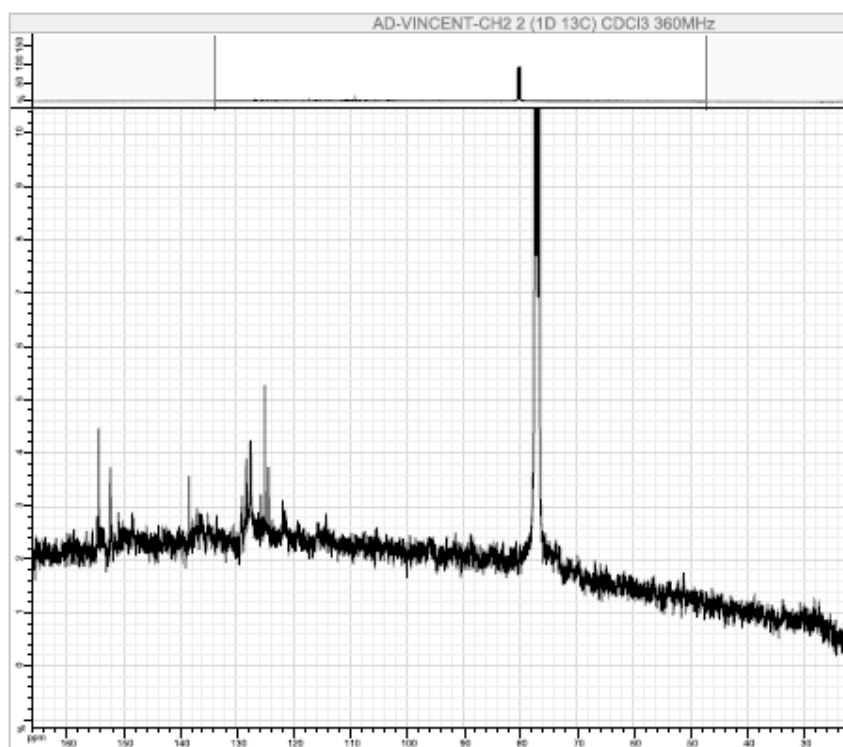

**Figure S8.** 2D COSY NMR spectrum of compound **8**

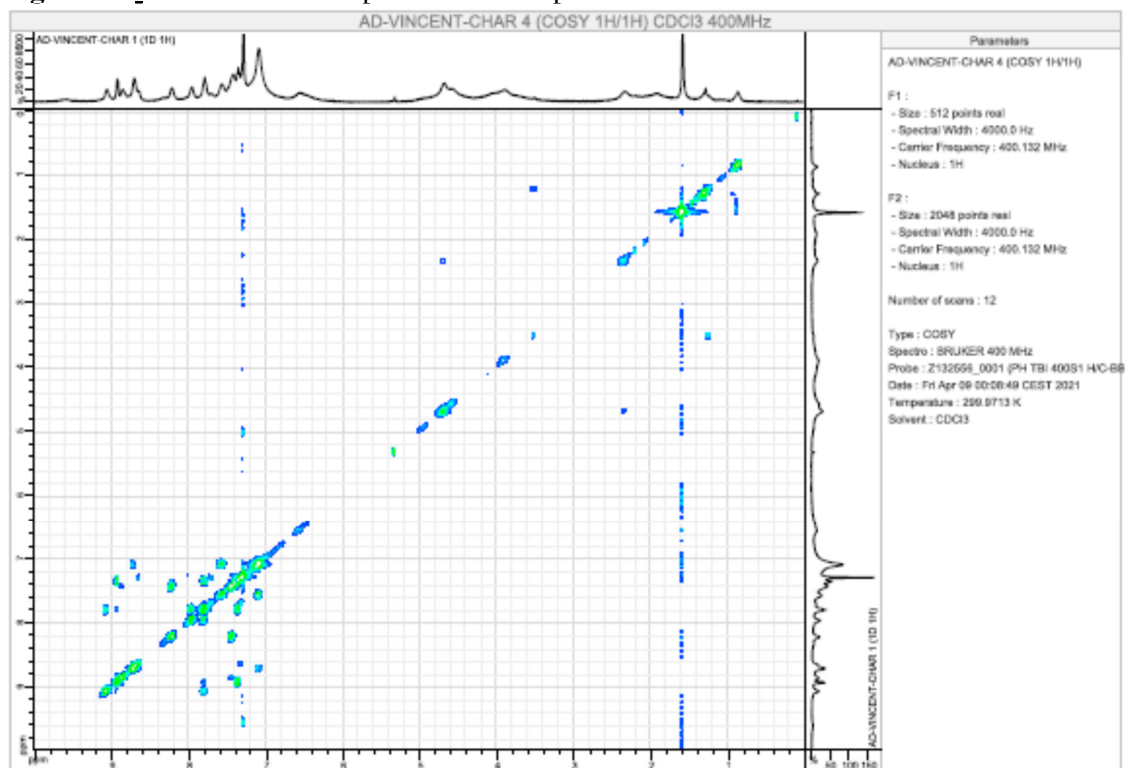

**Figure S9.** 2D HSQC NMR spectrum of **8**

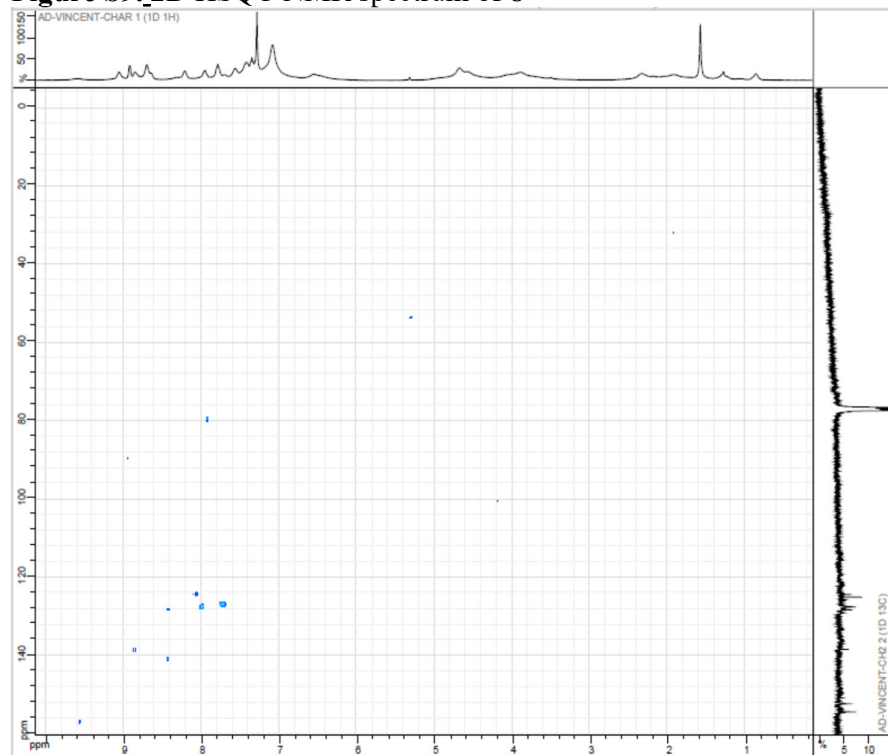

**Figure S10.** 2D HMBC NMR spectrum of **8**

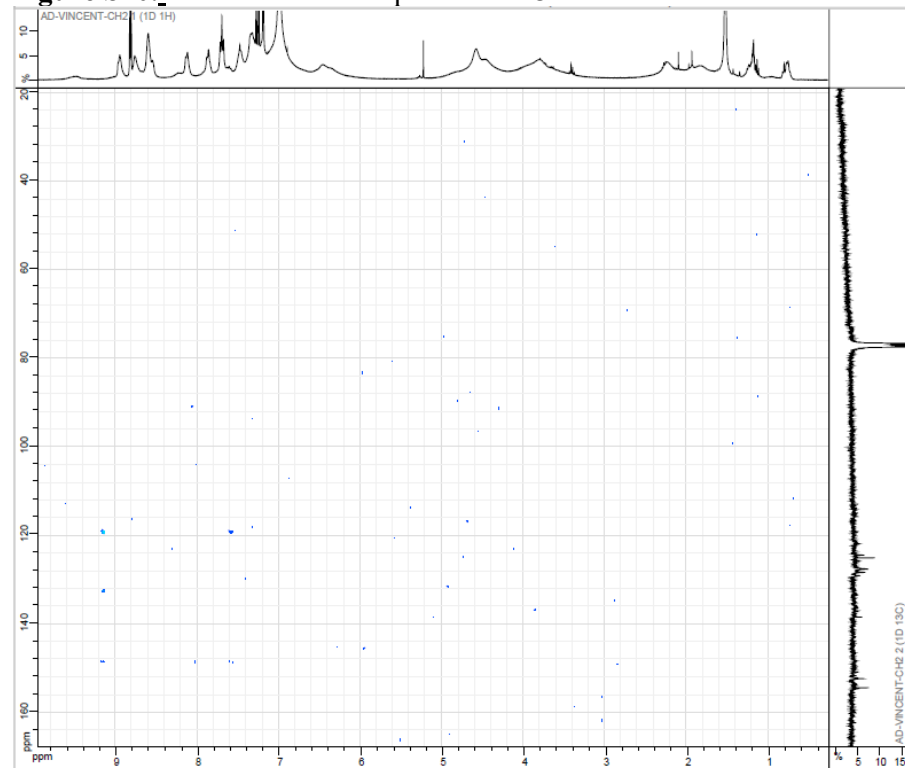

**Figure S11.** XPS spectra of compound **8**  
Survey

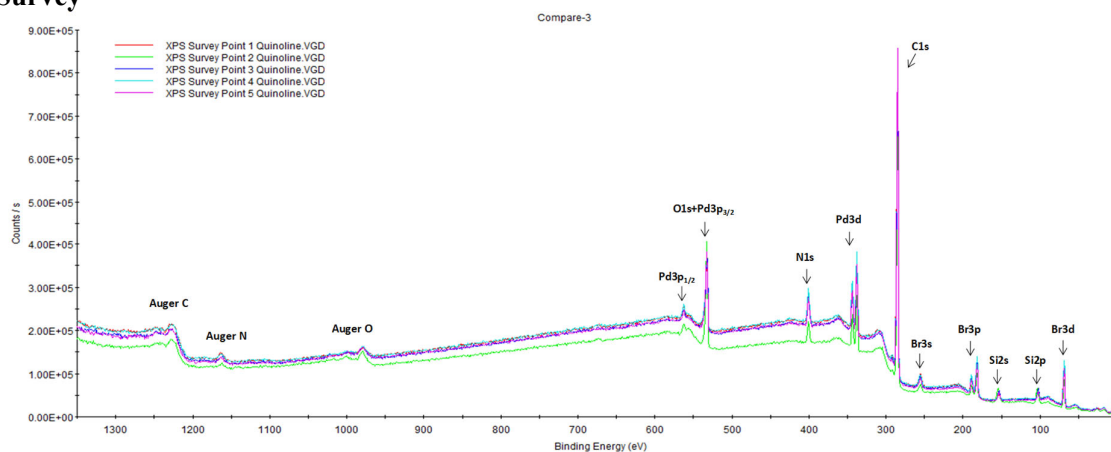

Note: the XPS analysis was performed on different areas of the same sample, to check the homogeneity of the composition. The compositions were found constant.

| Name   | Peak BE | FWHM eV | Area (N) | Atomic % |
|--------|---------|---------|----------|----------|
| Br3d 2 | 68,28   | 2,04    | 159,9    | 3,9      |
| Pd3d 2 | 337,7   | 1,3     | 86,05    | 2,1      |
| C1s    | 284,62  | 1,83    | 3641,99  | 88,4     |
| N1s    | 400,53  | 1,9     | 231,54   | 5,6      |

**Figure S12.** XPS spectra of compound **8** Pd 3d  
Pd 3d

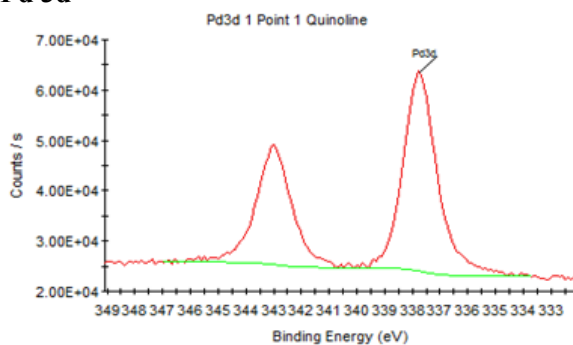

**Figure S13.** XPS spectra of compound **8** Br 3d  
Br 3d

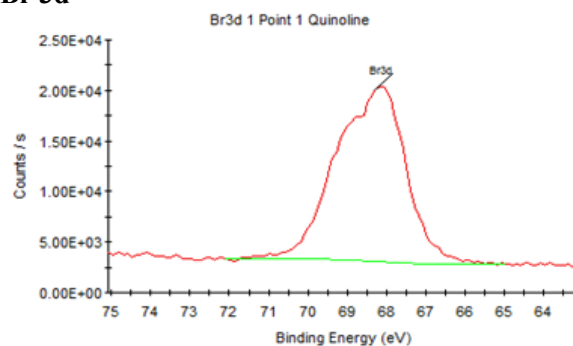

Supplement: s1 [file s1]
